# Supplementary figures and images for: ELKS controls the pool of readily releasable vesicles at excitatory synapses through its N-terminal coiled-coil domains
Source: eLife journal article supplement (doi:10.7554/elife.14862), 2016-06-02

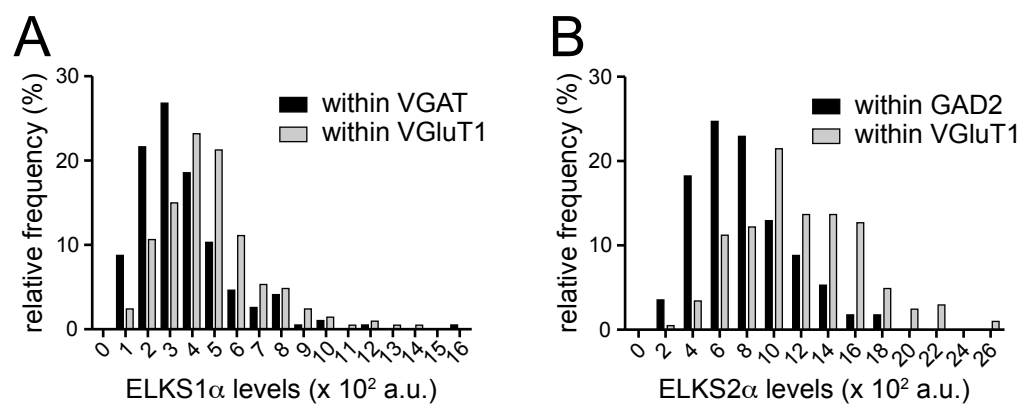

Figure 1 - figure supplement 2, Held et al.

Supplement: supp [file elife-14862-supp-v1.zip]

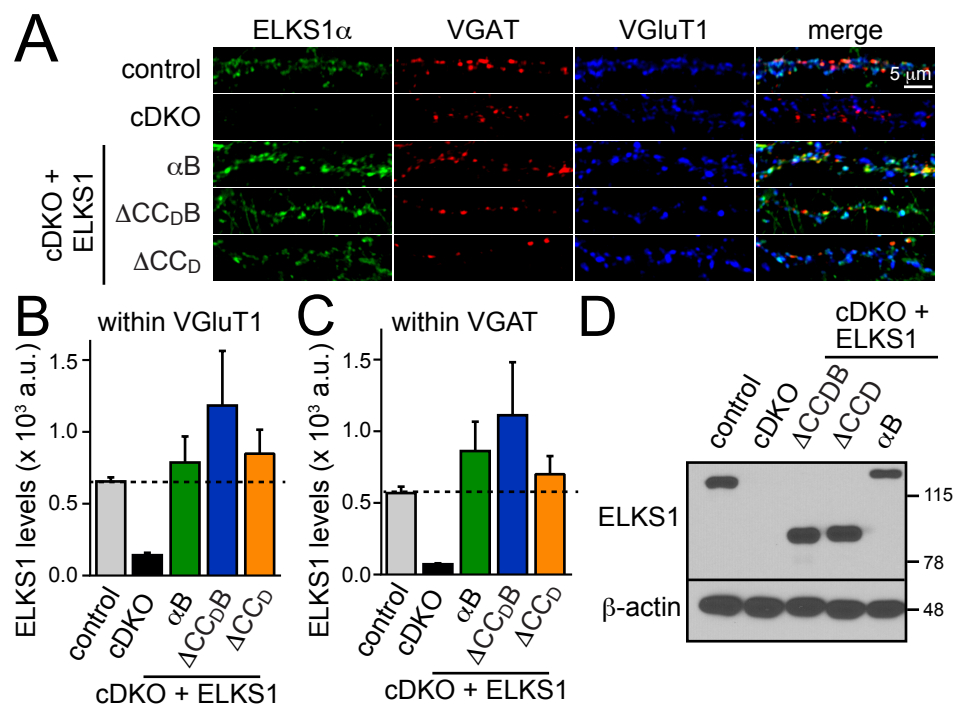

Figure 7 - figure supplement 1, Held et al.

Supplement: supp [file elife-14862-supp-v1.zip]

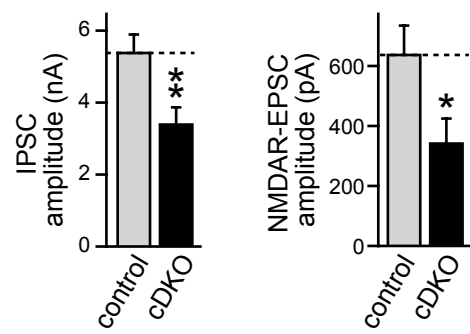

Figure 5 - figure supplement 1, Held et al.

Supplement: supp [file elife-14862-supp-v1.zip]

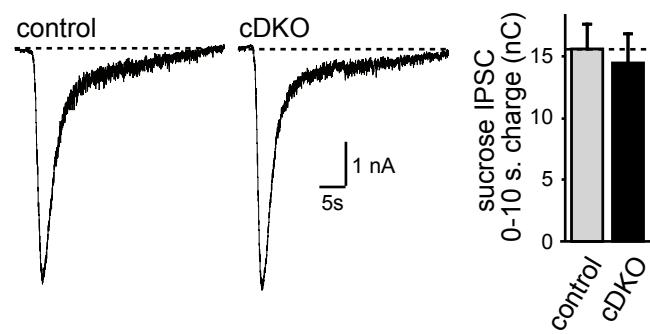

Figure 5 - figure supplement 2, Held et al.

Supplement: supp [file elife-14862-supp-v1.zip]

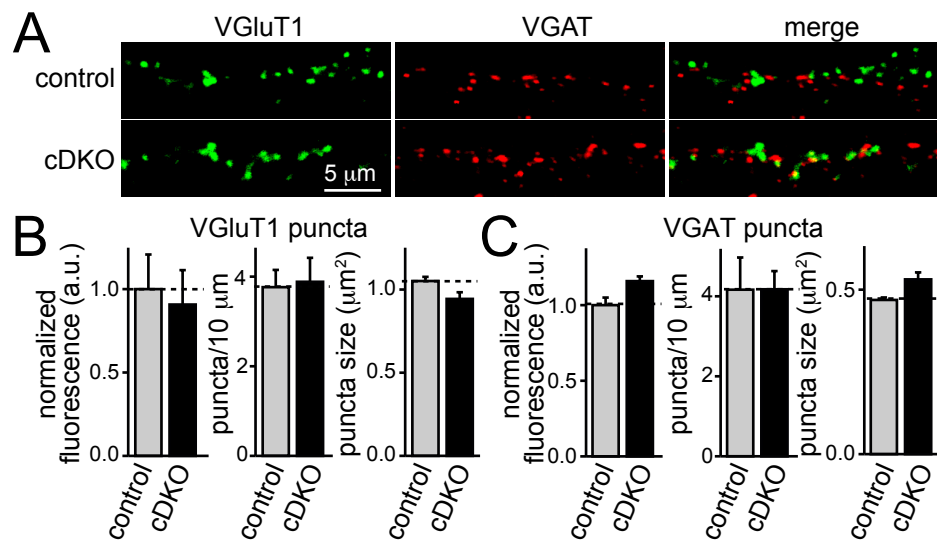

Figure 2 - figure supplement 1, Held et al.

Supplement: supp [file elife-14862-supp-v1.zip]

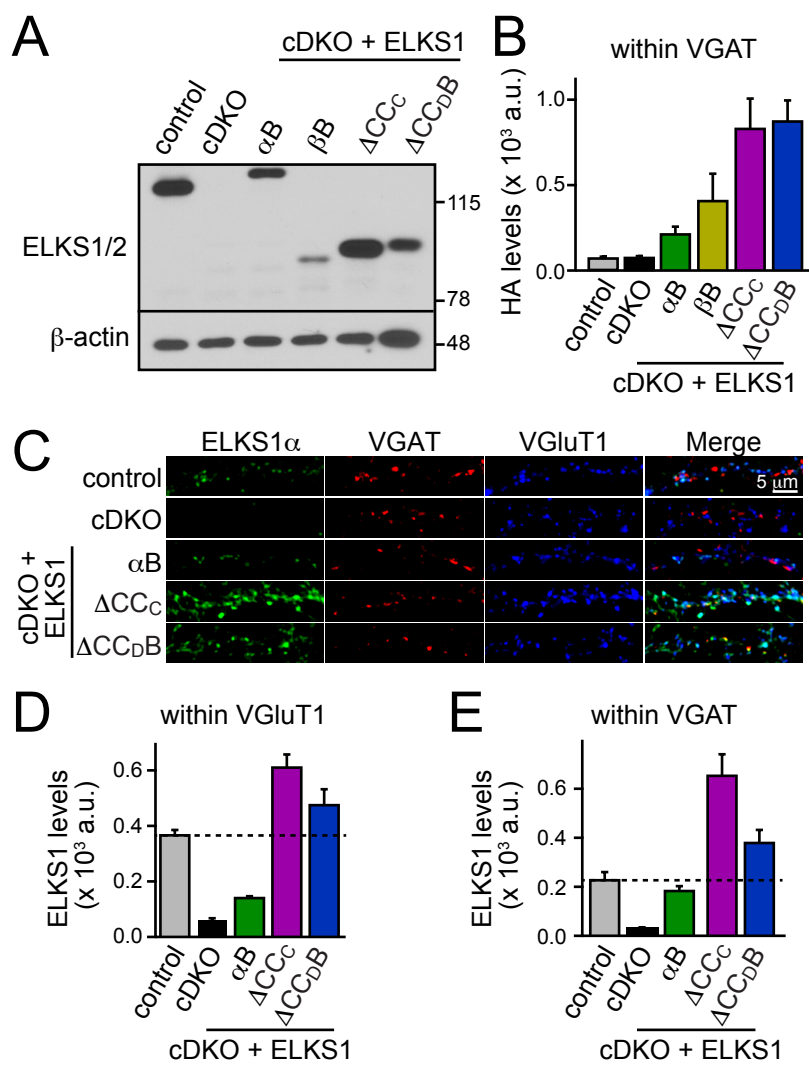

Figure 8 - figure supplement 1, Held et al.

Supplement: supp [file elife-14862-supp-v1.zip]

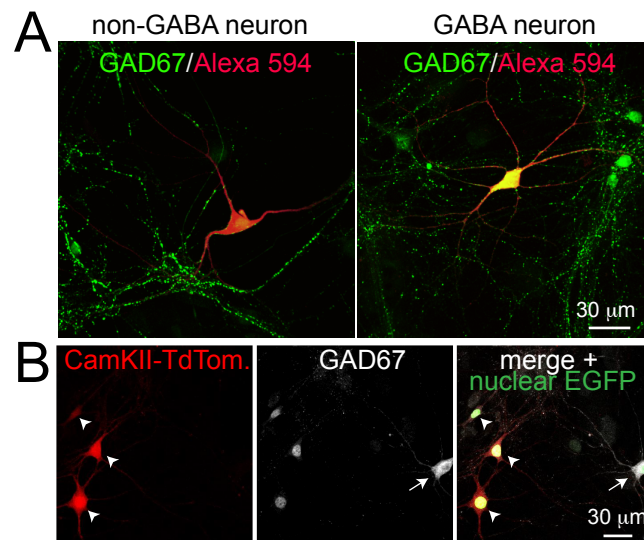

Figure 3 - figure supplement 1, Held et al.

Supplement: supp [file elife-14862-supp-v1.zip]

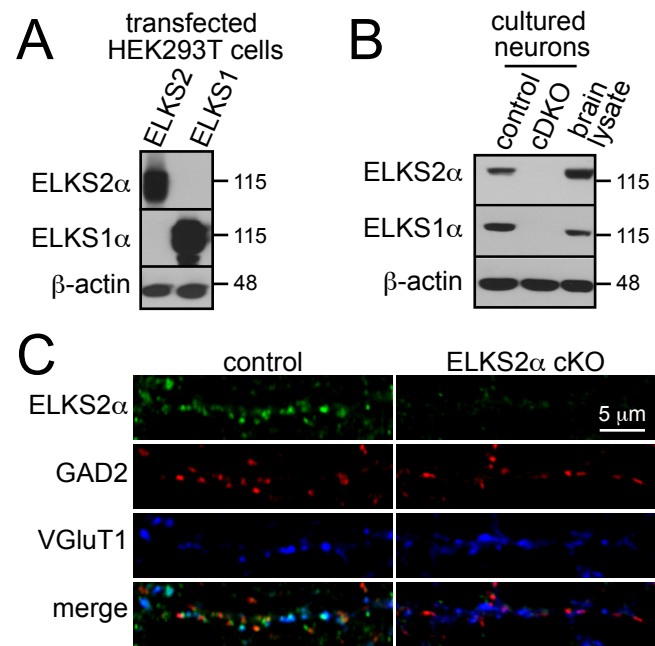

Figure 1 - figure supplement 1, Held et al.

Supplement: supp [file elife-14862-supp-v1.zip]

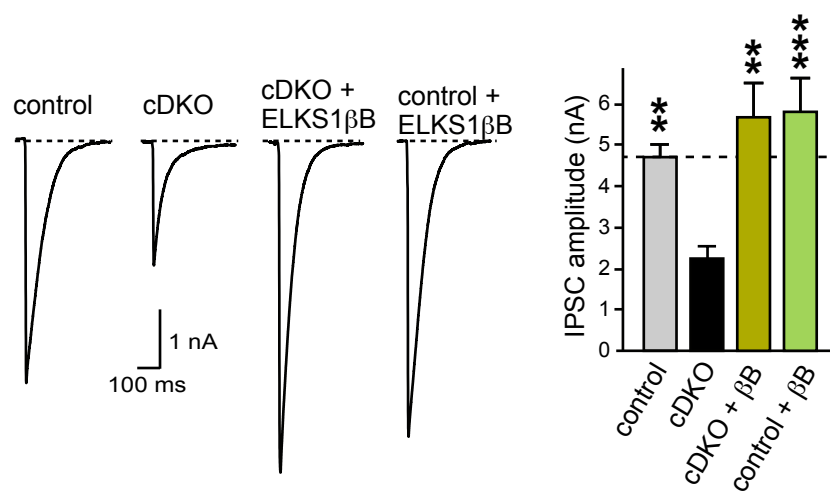

Figure 8 - figure supplement 2, Held et al.

Supplement: supp [file elife-14862-supp-v1.zip]
